# Supplementary material for: Targeting hunter distribution based on host resource selection and kill sites to manage disease risk
Source: PubMed Central journal article supplement (PMC3853570; doi:10.1002/ece3.788), 2013-10-01

## Supporting Information

**Table S1.** *A priori* selection of environmental covariates for elk (*Cervus canadensis manitobensis*) to derive resource selection function models and selection ratios at the scale of the quarter section ( $n = 20,970$ ) during the hunting season (Sep-Feb) in southwestern Manitoba, Canada.

| Covariate  | Mean $\pm$ S.E.   | Description of covariate                                                         |
|------------|-------------------|----------------------------------------------------------------------------------|
| Park       | $1.67 \pm 0.01$   | Minimum distance to protected area or refuge (RMNP and DMPP&F; km)               |
| Forestbuff | $0.20 \pm 0.01$   | Proportion of deciduous forest cover within a 5 km buffer around quarter section |
| Town       | $9.08 \pm 0.12$   | Minimum distance to town (km)                                                    |
| Highway    | $2.32 \pm 0.03$   | Minimum distance to highway (km)                                                 |
| Forest     | $0.18 \pm <0.001$ | Proportion of deciduous forest cover within the quarter section                  |
| Road       | $0.01 \pm <0.001$ | Density of roads (km <sup>2</sup> )                                              |
| Crop       | $0.44 \pm 0.01$   | Proportion of annual cereal/oilseed                                              |
| Stream     | $0.79 \pm 0.01$   | Minimum distance to stream (km)                                                  |
| Water      | $0.03 \pm <0.001$ | Proportion of water cover including lakes and rivers                             |
| Forage     | $0.04 \pm <0.001$ | Proportion of perennial forage crops                                             |
| Wetland    | $0.02 \pm <0.001$ | Proportion of marsh and fen                                                      |
| Grassland  | $0.25 \pm <0.001$ | Proportion of grassland                                                          |

**Table S2.** Standardized parameter estimates from logistic regression resource selection function models for collared and hunter-killed adult females and juvenile males during the hunting season (September–March; 2002–2012) in southwestern Manitoba, Canada. Model-averaged  $\beta$  coefficient for each predictor covariate derived from an average of all possible models with a change in Akaike value  $< 2$  ( $\Delta$ AIC, 2.0). Covariates are described in Supporting Information, Table S1.

|                         | <b>Collared Females</b> | <b>Collared Males</b> | <b>Hunter-killed Females</b> | <b>Hunter-killed Males</b> |
|-------------------------|-------------------------|-----------------------|------------------------------|----------------------------|
| <b>Covariate</b>        | $\beta$ Coefficient     | $\beta$ Coefficient   | $\beta$ Coefficient          | $\beta$ Coefficient        |
| Park (km)               | -1.35                   | -2.70                 | -0.74                        | -0.68                      |
| Forest (%)              | 0.49                    | 0.87                  | 0.78                         | 0.35                       |
| Forestbuff (%)          | -0.61                   | -0.87                 | 0.73                         | 0.67                       |
| Highway (km)            | 1.39                    | --                    | 0.33                         | 0.50                       |
| Road (km <sup>2</sup> ) | -0.03                   | -0.22                 | -0.73                        | -0.74                      |
| Town (km)               | 0.91                    | 0.77                  | 0.99                         | 1.44                       |
| Grassland (%)           | --                      | --                    | -0.39                        | -0.13                      |
| Forage (%)              | --                      | --                    | --                           | --                         |
| Crop (%)                | -0.09                   | 0.60                  | --                           | --                         |
| Water (%)               | -0.04                   | -0.13                 | -2.13                        | -1.96                      |
| Wetland (%)             | --                      | --                    | -0.55                        | -0.47                      |
| Stream (km)             | --                      | --                    | 1.44                         | 1.49                       |

**Figure S1.** Overall schematic outline of the analyses to map disease risk management areas.

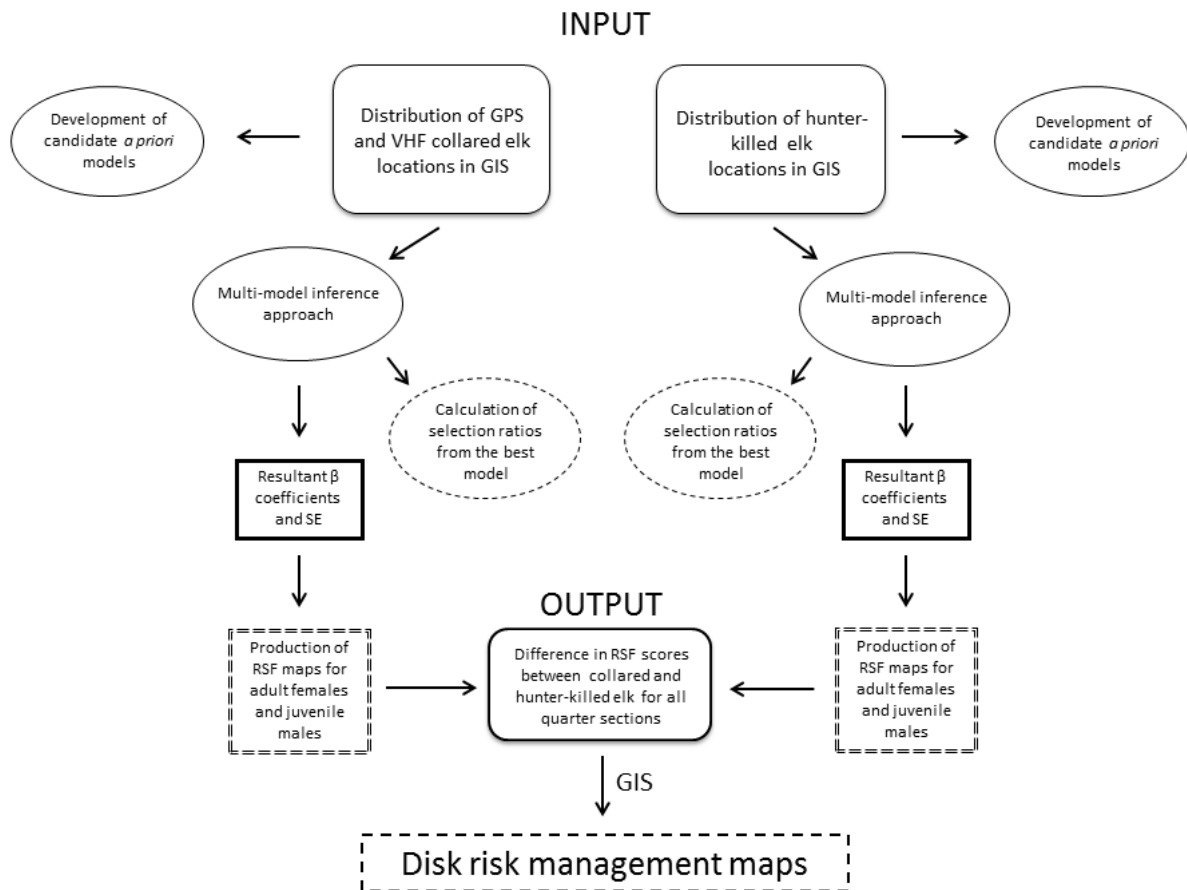

Supplement: ece30003-4265-SD1.pdf [file ece30003-4265-SD1.pdf]
